# Supplementary material for: Low Molecular Weight and High Deacetylation Degree Chitosan Batch Alleviates Pathogenesis, Toxin Accumulation, and Fusarium Gene Regulation in Barley Leaf Pathosystem
Source: Int J Mol Sci. 2023 Aug 17;24(16):12894. doi: 10.3390/ijms241612894 (PMC10454492; doi:10.3390/ijms241612894)
Supplement: Supplementary file 1 [file ijms-24-12894-s001.zip › ijms-2527053-supplementary.pdf]

Trypan blue staining of *Fusarium graminearum* macroconidia

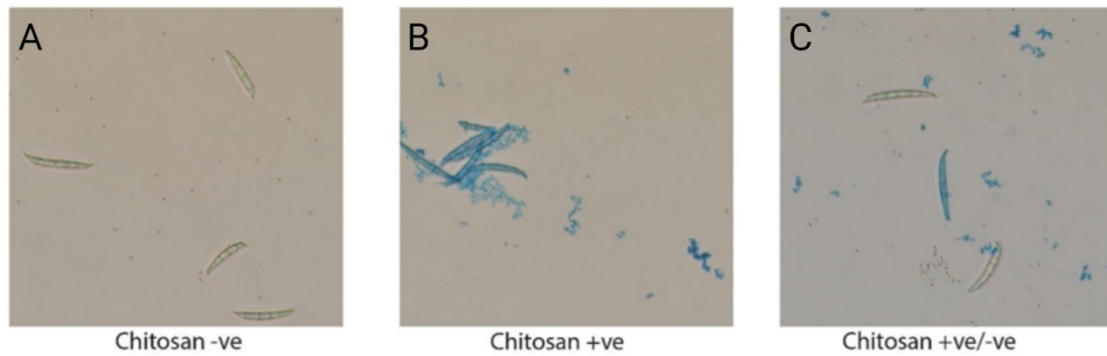

**Figure S1.** Light microscope picture (200x magnification) of trypan blue staining of *F. graminearum* macroconidia cultured in PDB medium with CS\_10 at a concentration of 200 ppm. (A) Negative control culture (no CS\_10 application) of *Fg* showing no staining with Trypan blue and indicates live *Fg* macroconidia. (B) Positive culture (CS\_10 application) of killed and stained *Fg* macroconidia showing the antifungal impact of CS\_10. (C) A mixed culture of negative and positive *Fg* macroconidia showing the authenticity of the Trypan blue staining method.

## RNA-Seq Data Outputs

| Ensemble ID | Function                                           | Log2 Fold Change | Regulation |
|-------------|----------------------------------------------------|------------------|------------|
| FGSG_03842  | carbohydrate metabolic process-calcium ion binding | -2.85            | Down       |
| FGSG_00571  | carbohydrate metabolic process-cellulose binding   | -7.52            | Down       |
| FGSG_06605  | carbohydrate metabolic process                     | -1.49            | Down       |
| FGSG_00007  | iron ion binding                                   | 1.52             | Up         |

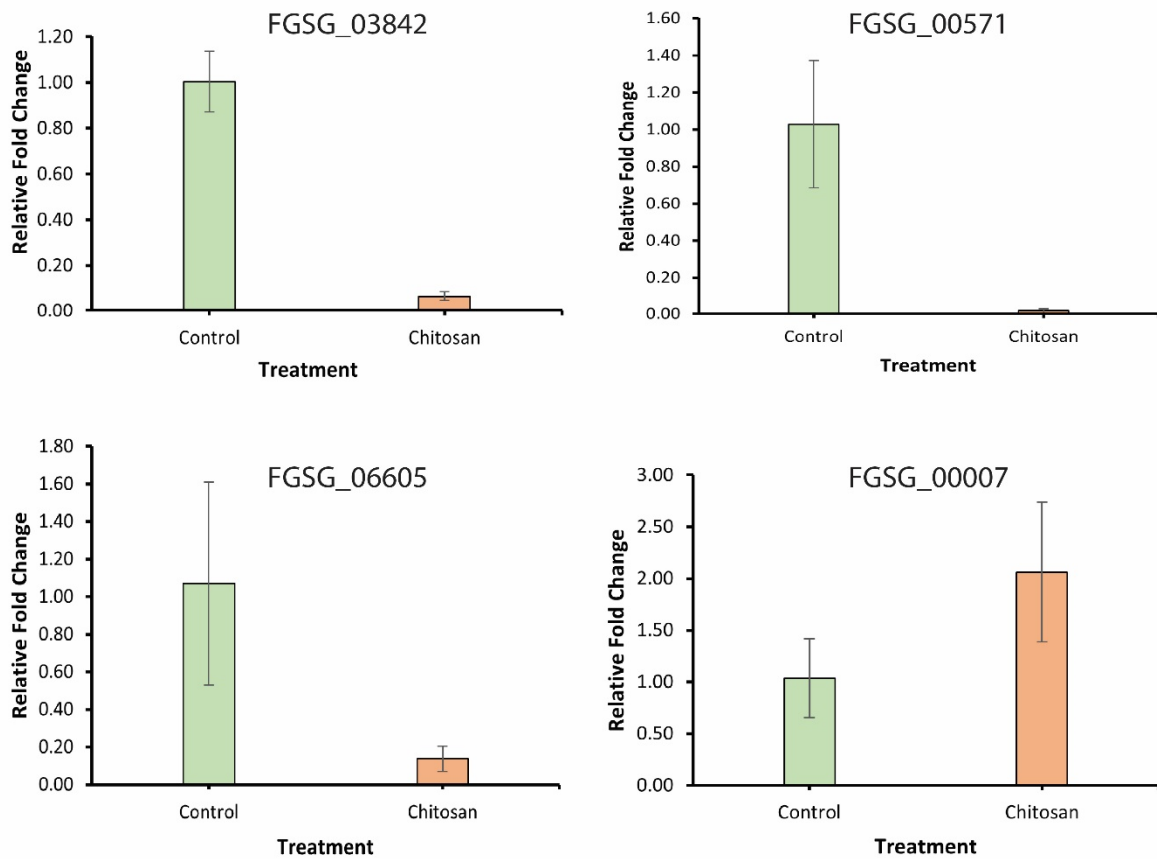

**Figure S2.** qPCR expression of *F. graminearum* genes in response to chitosan treatment. Relative expression levels of the *Fg* were normalized using the beta-tubulin gene as internal control and were measured through the  $2^{-\Delta\Delta C_t}$  method. The bar plots represent the relative fold change expression of three biological replicates and error bars represent the average means. The qPCR expression is in line with the RNA-Seq Data and confirms the validity of the expression.

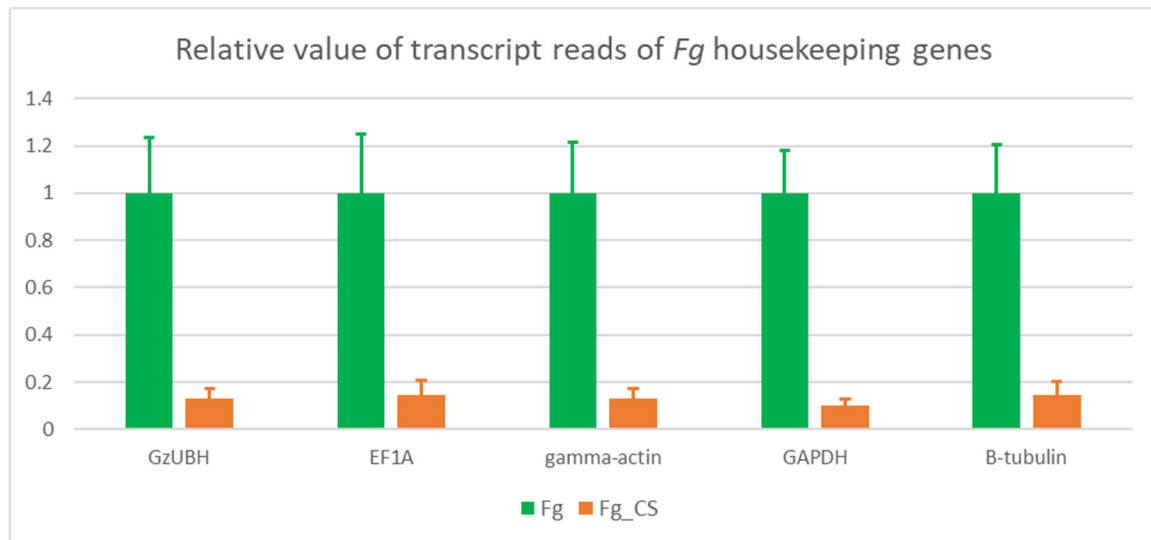

**Figure S3.** Relative value of transcript reads of *F. graminearum* housekeeping genes. Number of transcripts reads for each of selected housekeeping genes has been estimated based on transcriptomics results. The number of transcripts reads of the *Fg* sample has been counted as '1' while the sample treated with CS (*Fg\_CS*) is shown as relative value.

**Table S1:** The list of Primers used for qPCR experiment based on Harris et al. (2016).

| Gene Name                                   | Sequence                                           | Gene involved in                        |
|---------------------------------------------|----------------------------------------------------|-----------------------------------------|
| FGSG_03842                                  | F: GAACACGGATGGTGGATACC<br>R: CCCTTTACCCATGTGGTTTG | Starch synthesis pathways               |
| FGSG_00571                                  | F: GGCTCCCATGGTTCTTGTTA<br>R: GTTGGGGACGTTCTTCTCAA | Starch synthesis pathways               |
| FGSG_06605                                  | F: TCTGGAGTCATTGCTTGTGC<br>R: GCGAAAGGCCAGTTGTAGAG | Starch synthesis pathways               |
| FGSG_00007                                  | F: GTGCGGTTTTGACCAGATTT<br>R: TATCAAGAGAGCGCAGCAGA | Cytochrome Synthesis                    |
| <i>Fg</i> -Elongation Factor 1 (FGSG_08811) | F: CCTCCAGGATGTCTACAAGA<br>R: CTCAACGGACTTGACTTCAG | Housekeeping gene (Harris, et al. 2016) |

Harris, L. J., Balcerzak, M., Johnston, A., Schneiderman, D., & Ouellet, T. (2016). Host-preferential *Fusarium graminearum* gene expression during infection of wheat, barley, and maize. *Fungal Biol*, 120(1), 111-123.

**Table S2.** The list of differentially expressed genes discussed in the manuscript.

| Gene ID    | log2fold change | fold change | Annotation                              |
|------------|-----------------|-------------|-----------------------------------------|
| FGSG_00071 | 1.424           | 2.684       | TRI1                                    |
| FGSG_00571 | -7.522          | 0.005       | exoglucanase 1 precursor                |
| FGSG_01403 | -0.791          | 0.578       | minor allergen alt a 7                  |
| FGSG_01419 | -1.209          | 0.433       | long-chain acyl- synthetase             |
| FGSG_01786 | -2.273          | 0.207       | ent-kaurene oxidase                     |
| FGSG_01959 | 0.277           | 1.212       | cytochrome P450 61                      |
| FGSG_02113 | -0.816          | 0.568       | cytochrome p450 3a7                     |
| FGSG_02327 | 5.203           | 36.843      | flavin adenine dinucleotide (FAD)       |
| FGSG_02328 | 4.090           | 17.036      | multicopper oxidase                     |
| FGSG_02366 | 1.724           | 3.302       | sterigmatocystin biosynthesis           |
| FGSG_02367 | 1.565           | 2.959       | trichodiene oxygenase cytochrome P450   |
| FGSG_02371 | 2.863           | 7.276       | cytochrome P450 monooxygenase           |
| FGSG_03049 | -5.749          | 0.019       | alpha-n-arabinofuranosidase 2           |
| FGSG_03532 | 1.781           | 3.436       | TRI8                                    |
| FGSG_03533 | 1.519           | 2.865       | TRI7                                    |
| FGSG_03534 | 1.541           | 2.911       | TRI3                                    |
| FGSG_03535 | 1.390           | 2.620       | TRI4                                    |
| FGSG_03537 | 1.645           | 3.128       | TRI5                                    |
| FGSG_03540 | 1.300           | 2.461       | TRI11                                   |
| FGSG_03624 | -2.485          | 0.179       | XYLB                                    |
| FGSG_03628 | -6.517          | 0.011       | exoglucanase-6A precursor               |
| FGSG_03795 | -6.930          | 0.008       | endoglucanase 3 precursor               |
| FGSG_03796 | 0.406           | 1.325       | prostacyclin synthase                   |
| FGSG_05140 | -1.372          | 0.386       | acyl- dehydrogenase                     |
| FGSG_05551 | -1.198          | 0.436       | trans-enoyl- isomerase                  |
| FGSG_06445 | -6.595          | 0.010       | glycosyl hydrolase family 10            |
| FGSG_06554 | 2.663           | 6.332       | catalase 1                              |
| FGSG_06605 | -1.491          | 0.356       | beta-glucosidase 1 precursor            |
| FGSG_06733 | 2.007           | 4.021       | catalase 3                              |
| FGSG_07274 | -2.827          | 0.141       | probable beta-glucosidase               |
| FGSG_07695 | -6.928          | 0.008       | xylosidase glycosyl                     |
| FGSG_07765 | -2.553          | 0.170       | trichothecene c-15 hydroxylase          |
| FGSG_07896 | 1.025           | 2.035       | TRI10                                   |
| FGSG_08011 | -6.584          | 0.010       | endo-beta- -glucanase d                 |
| FGSG_08800 | 0.347           | 1.272       | bzip transcription factor (Fgap1)       |
| FGSG_09786 | 0.665           | 1.586       | NADPH-cytochrome P450 reductase         |
| FGSG_09895 | -0.159          | 0.896       | neutral trehalase                       |
| FGSG_10571 | -2.089          | 0.235       | O-methylsterigmatocystin oxidoreductase |
| FGSG_10571 | -2.089          | 0.235       | O-methylsterigmatocystin oxidoreductase |
| FGSG_10999 | -6.697          | 0.010       | XYLA                                    |
| FGSG_11208 | -5.928          | 0.016       | xyloglucanase                           |
| FGSG_11258 | -7.085          | 0.007       | endo-1,4-beta-xylanase B                |
| FGSG_11428 | -5.812          | 0.018       | feruloyl esterase B                     |
| FGSG_11656 | 5.596           | 48.370      | fatty acid synthase beta subunit        |
| FGSG_12369 | 1.127           | 2.184       | catalase 4                              |
| FGSG_12551 | -6.376          | 0.012       | hypothetical protein                    |
| FGSG_13855 | 5.667           | 50.825      | hypothetical protein                    |
